# Supplementary material for: Rapid-prototyping a Brownian particle in an active bath
Source: Royal Society of Chemistry journal article supplement (doi:10.1039/d0sm00828a), 2020-01-01
Supplement: d0sm00828a1.pdf [file d0sm00828a1.pdf]

## Supplementary Information

### Rapid-Prototyping a Brownian Particle in an Active Bath

Jin Tae Park,<sup>a,b</sup> Govind Paneru,<sup>a</sup> Chulan Kwon,<sup>d,\*</sup> Steve Granick,<sup>a,c,\*</sup> and Hyuk Kyu Pak<sup>a,b,\*</sup>

<sup>a</sup>Center for Soft and Living Matter, Institute for Basic Science (IBS), Ulsan 44919, South Korea

<sup>b</sup>Department of Physics, Ulsan National Institute of Science and Technology (UNIST), Ulsan  
44919, South Korea

<sup>c</sup>Department of Chemistry, Ulsan National Institute of Science and Technology (UNIST), Ulsan  
44919, South Korea

<sup>d</sup>Department of Physics, Myongji University, Yongin, Gyeonggi-Do 17058, South Korea

### Theoretical overview

The tracer particle is kicked by a series of active forces, each of which is generated randomly at the time  $t_i$  with random amplitude. Each kick shifts the center of the trap decaying exponentially with characteristic time  $\tau_c$ , which is schematically shown in Fig.

1. Then, the active force acting on the tracer particle at a certain time  $t$  is the sum of active forces remaining until the time  $t$ , given as

$$\xi_{act}(t) = k \sum_i d_i e^{-(t-t_i)/\tau_c} \cdot \theta(t-t_i) = kx_c(t), \quad \backslash * \text{ MERGEFORMAT (S1)}$$

where  $\theta(t-t_i)$  is the step function equal to 1 for  $t > t_i$  and 0 otherwise.  $d_i$  is a Gaussian random number with variance  $X^2$  and  $t_i$  is produced by the Poisson distribution with mean interval  $\tau_p$ . The resultant position  $x_c(t)$  of the center of the shifted potential is equal to the sum of the forces divided by  $k$ , given in the above equation.

The particle position can be expressed as  $x \equiv x_{th} + x_{act}$ , where  $x_{th}$  is due to the thermal noise and  $x_{act}$  due to the active force. Therefore, Eq. (1) in the text can be expressed as a set of two stochastic differential equations which are completely independent to each other.

$$\gamma \ddot{x}_{th} = -kx_{th} + \xi_{th}, \quad \gamma \ddot{x}_{act} = -kx_{act} + \xi_{act} \quad \backslash * \text{ MERGEFORMAT (S2)}$$

Here,  $\xi_{th}(t)$  is a usual thermal noise with zero mean and time-correlation  $\langle \xi_{th}(t) \xi_{th}(t') \rangle = 2\gamma k_B T \delta(t-t')$  and  $\xi_{act}(t)$  is an active force in Eq. (S1). The time-correlation function of active forces is useful to investigate the stochastic properties of the system such as  $\langle x^2 \rangle$ ,  $\langle x(t)x(t') \rangle$  etc., where  $\langle \dots \rangle$  denotes the average over thermal and active forces. We find for  $t' > t$

$$\langle \xi_{act}(t) \xi_{act}(t') \rangle = k^2 X^2 e^{-(t'-t)/\tau_c} \left\langle \sum_i e^{-2(t-t_i)/\tau_c} \right\rangle, \quad \backslash * \text{ MERGEFORMAT}$$

(S3)

where we use  $\langle d_i d_j \rangle = X^2 \delta_{ij}$ . Using the property of the Poisson distribution,

$$\left\langle \sum_i e^{-2(t-t')/\tau_c} \right\rangle = \int_0^t \frac{ds}{\tau_p} e^{-2(t-s)/\tau_c}. \quad \backslash * \text{ MERGEFORMAT (S4)}$$

Using Eq. (S4) for steady-state condition ( $t \gg \tau_c$ ), the noise auto-correlation function in Eq. (S3) takes the following form

$$\langle \xi_{act}(t) \xi_{act}(t') \rangle = k^2 X^2 \frac{\tau_c}{2\tau_p} e^{-(t'-t)/\tau_c}. \quad \backslash * \text{ MERGEFORMAT (S5)}$$

The exponential correlation in this equation is similar to that for the OU noise, but higher-order cumulants are present for all orders, unlike the OU noise. As  $\tau_c/\tau_p$  increases, the active noise becomes the OU noise, as seen in Fig. 1(c) in the text. We can observe such a tendency as the kurtosis  $\propto \tau_p/\tau_c$  decreases.

One of the Referees provided a rigorous proof for the transition to the OU noise in the reviewing process. We will summarize the proof in the following. Integrating Eq. (3) from  $t$  to  $t+dt$ ,  $\xi_{act}(t+dt) = \xi$  and  $\xi_{act}(t) = \xi'$  are related as  $\xi = \xi' - \xi'/\tau_c dt + h$ , where  $h = kd$  for random amplitude  $d$  with probability  $dt/\tau_p$  and  $h = 0$  with probability  $1 - dt/\tau_p$ . Then, the Kolmogorov equation for Eq. (3) is written up to the first order in  $dt$  as

$$\begin{aligned}
P(\xi, t+dt) &= \int d\xi' P(\xi', t) [\delta(\xi - \xi' + \xi'/\tau_c dt) (1 - dt/\tau_p) \\
&+ \delta(\xi - \xi' + \xi'/\tau_c dt - hd) (dt/\tau_p)] \\
&= P(\xi, t) + \frac{dt}{\tau_p} [P(\xi - ky) - P(\xi)] + \frac{dt}{\tau_c} \frac{\partial}{\partial \xi} \xi P(\xi, t).
\end{aligned}
\tag{S6}$$

Here,  $\delta(\xi - \xi' + cdt) = (1 - cdt \partial/\partial \xi') \delta(\xi - \xi')$  is used and the integration is done over  $\xi'$ .

Then, expanding  $P(\xi - ky)$  in powers of  $y$  and averaging over  $y$ , we get

$$\frac{\partial P(\xi, t)}{\partial t} = \frac{1}{\tau_c} \frac{\partial}{\partial \xi} \xi P(\xi, t) + \frac{1}{\tau_p} \sum_{n=1}^{\infty} \frac{k^{2n} C_{2n}}{n!} \frac{\partial^n}{\partial \xi^n} P(\xi, t).
\tag{S7}$$

Here,  $C_{2n} = \langle d^{2n} \rangle$  with the bracket denoting the average over  $y$ . By changing variables

as  $T = t/\tau_c$  and  $X = \xi/\sqrt{\Omega}$  for  $\Omega = \tau_c/\tau_p$ , we find

$$\frac{\partial P(X, T)}{\partial T} = \frac{\partial}{\partial X} X P(X, T) + \sum_{n=1}^{\infty} \frac{k^{2n} C_{2n} \Omega^{1-n}}{(2n)!} \frac{\partial^{2n}}{\partial X^{2n}} P(X, T).
\tag{S8}$$

In the limit  $\Omega \rightarrow \infty$ , we get the OU process

$$\frac{\partial P(X, T)}{\partial T} = \frac{\partial}{\partial X} X P(X, T) + \frac{k^2 C_2}{2} \frac{\partial^2}{\partial X^2} P(X, T).
\tag{S9}$$

We initially prepared the system in equilibrium in the absence of the active force. Then, the PDF of  $x_{th}$  remains Boltzmann every time, and hence that of  $x - x_{act}(t)$  for a given  $x_{act}(t)$  such that

$$P(x, t | x_{act}) = \sqrt{\frac{k}{2\pi k_B T}} e^{-k(x - x_{act}(t))^2 / 2k_B T}.
\tag{S10}$$

This conditional PDF of  $x$  for  $x_{act}(t)$  is Gaussian, while the PDF averaged over  $x_{act}(t)$

becomes non-Gaussian in general.

From Eq. (S2), we have

$$x_{th}(t) = \frac{1}{\gamma} \int_0^t ds e^{-(t-s)/\tau_k} \xi_{th}(s), \quad x_{act}(t) = \frac{1}{\gamma} \int_0^t ds e^{-(t-s)/\tau_k} \xi_{act}(s). \quad \backslash *$$

MERGEFORMAT (S11)

The variance of each position is calculated from Eqs. (S5) and (S11), given as

$$\langle x_{th}^2 \rangle = \frac{k_B T}{k}, \quad \langle x_{act}^2 \rangle = \frac{X^2}{2} \frac{\tau_c}{\tau_p} \left( 1 + \frac{\tau_k}{\tau_c} \right)^{-1} = \frac{k_B T_{act}}{k}, \quad \backslash *$$

MERGEFORMAT (S12)

where  $T_{act}$  is tracer activity which increases due to active force and the long-time limit

$t \gg \tau_c$  is used. Then, we find the variance of  $x = x_{th} + x_{act}$  as

$$\langle x^2 \rangle = \langle x_{th}^2 \rangle + \langle x_{act}^2 \rangle = \frac{k_B (T + T_{act})}{k}. \quad \backslash \text{MERGEFORMAT}$$

(S13)

The full statistics requires the information of all the moments of higher orders due to a non-Gaussian property of  $x_{act}$ , which is practically not possible. Fig. S1 shows the PDFs of  $x$ ,  $x_{act}$ , and  $x_{th}$ . For large  $\tau_c/\tau_p$ ,  $P(x_{act})$  and  $P(x)$  are close to Gaussian distributions because a large number of peaks in correlation time  $\tau_c$  behave as Gaussian due to the central limit theorem.

**Van Hove self-correlation function**  $G_s(\Delta x, \Delta t)$

It is defined as the PDF of the particle displacement  $\Delta x$  during  $\Delta t$ . We estimate the non-Gaussian parameter given in the text as  $\alpha_2 \equiv [\langle x^4 \rangle / 5 \langle x^2 \rangle^2] - 3/5$ . The result is shown in Fig. S2.

### Mean square displacement (MSD) of a free particle in an active bath

If we consider a free particle in an active bath (without harmonic potential), the Langevin equation is described as  $\gamma \dot{x}(t) = \xi_{th}(t) + \xi_{act}(t)$ . Then the position of the particle  $x(t)$  is expressed as

$$\Delta x(t) = \frac{1}{\gamma} \int_0^t dt' [\xi_{th}(t') + \xi_{act}(t')] \quad \backslash * \text{ MERGEFORMAT}$$

(S14)

and the mean square displacement  $\langle \Delta x^2(t) \rangle$  of the particle is

$$\langle \Delta x^2(t) \rangle = \frac{1}{\gamma^2} \int_0^t dt' \int_0^t dt'' \langle \xi_{th}(t') \xi_{th}(t'') \rangle + \frac{1}{\gamma^2} \int_0^t dt' \int_0^t dt'' \langle \xi_{act}(t') \xi_{act}(t'') \rangle. \quad \backslash *$$

MERGEFORMAT (S15)

Using  $\langle \xi_{th}(t') \xi_{th}(t'') \rangle = 2\gamma k_B T \delta(t' - t'')$ ,  $\langle \xi_{act}(t') \xi_{act}(t'') \rangle \equiv C e^{-\frac{|t' - t''|}{\tau_c}}$ , and

$C = \gamma^2 \frac{D_{act}}{\tau_c} = \frac{f_{RMS}^2 \tau_c}{2\tau_p}$ , we can simplify Eq. (S11). Here the  $f_{RMS}$  is defined as random

active kick force. (In harmonic potential, the active force satisfies this relationship;

$$f_{RMS} = kX)$$

$$\langle \Delta x^2(t) \rangle = 2 \frac{k_B T}{\gamma} t + \frac{2C\tau_c}{\gamma^2} \int_0^t dt' e^{-t'/\tau_c} (e^{t'/\tau_c} - 1) \quad \backslash *$$

MERGEFORMAT (S16)

Finally, the MSD of a free particle in an active bath is expressed as

$$\langle \Delta x^2(t) \rangle = 2D_{th}t + 2D_{act} \left[ t - \tau_c \left( 1 - e^{-t/\tau_c} \right) \right]. \quad \text{MERGEFORMAT}$$

(S17)

### Power spectral density

We can apply the Fourier transformation for the position and noise variables in a steady-state where we can neglect initial memory terms containing  $e^{-t/\tau_k}$ . We write

$$x(t) = \frac{1}{\sqrt{2\pi}} \int_{-\infty}^{\infty} d\omega e^{i\omega t} x(\omega) \text{ and } x(\omega) = \frac{1}{\sqrt{2\pi}} \int_{-\infty}^{\infty} d\omega e^{-i\omega t} x(t). \text{ Then, Eq. (S2) yields}$$

$$x(\omega) = \frac{\xi_{th}(\omega) + \xi_{act}(\omega)}{k + i\gamma\omega}. \quad \text{MERGEFORMAT}$$

(S18)

$$\text{Using } \langle \xi_{th}(t) \xi_{th}(t') \rangle = 2\gamma^2 D_{th} \delta(t - t') \text{ and } \langle \xi_{act}(t) \xi_{act}(t') \rangle = \gamma^2 D_{act} \cdot (1 + \tau_c / \tau_k) \cdot e^{-|t-t'|/\tau_c} / \tau_c$$

from Eq. (S3), we get

$$\begin{aligned} \langle \xi_{th}(\omega) \xi_{th}(\omega') \rangle &= 2\gamma^2 D_{th} \delta(\omega + \omega'), \\ \langle \xi_{act}(\omega) \xi_{act}(\omega') \rangle &= \frac{2\gamma^2 D_{act} \cdot (1 + \tau_c / \tau_k)}{1 + \tau_c^2 \omega^2} \delta(\omega + \omega'), \end{aligned} \quad \backslash *$$

$$\text{MERGEFORMAT (S19)}$$

where  $D_{th} = k_B T / \gamma$  (diffusion constant of the medium) and  $D_{act} = k_B T_{act} / \gamma$  (active diffusion coefficient). As a result, we get  $\langle x(\omega) x(\omega') \rangle = S_{xx}(\omega) \delta(\omega + \omega')$  so that

$$S_{xx}(t - t') = \langle x(t) x(t') \rangle = \int_{-\infty}^{\infty} \frac{d\omega}{2\pi} C_{xx}(\omega) e^{i\omega(t-t')}. \quad \backslash *$$

$$\text{MERGEFORMAT (S20)}$$

Using Eq. (S18), the correlation function (spectral density) of position in frequency space

is given as

$$S_{xx}(\omega) = \frac{2/\tau_k}{\omega^2 + (1/\tau_k)^2} \left[ \frac{k_B T}{k} + \frac{k_B T_{act}}{k} \cdot \left( 1 + \frac{\tau_c}{\tau_k} \right) \cdot \frac{1}{1 + \omega^2 \tau_c^2} \right]. \quad \backslash *$$

MERGEFORMAT (S21)

It agrees well with the experimental results shown in Fig. S3.

## Heat dissipation

### *The violation of fluctuation-dissipation relation*

In nonequilibrium process, incessant heat production  $Q$  is found to be related to the violation of the fluctuation-dissipation theorem. Let  $C(t, t') = \langle v(t)v(t') \rangle$  and  $R(t, t')$  be correlation function and response functions for velocity, respectively. The violation of the fluctuation-dissipation relation (FDR) is given for  $t > t'$  as

$$C(t, t') - 2k_B T R(t, t') = \frac{1}{2\gamma} [\langle v(t)(-kx(t') + \xi_{act}(t')) \rangle + \langle v(t')(-kx(t) + \xi_{act}(t)) \rangle]. \quad \backslash *$$

MERGEFORMAT (S22)

The right side in this equation becomes  $\gamma^{-1} \langle \mathcal{Q} \rangle$  in the limit  $t \rightarrow t'$ , where

$\langle \mathcal{Q} \rangle = \langle \dot{x}(t)(\gamma \dot{x}(t) - \xi_{th}(t)) \rangle$  is the average rate of heat dissipation. To obtain the response

function, an infinitesimal perturbation  $f^p(t)$  is applied to the system. In this case, the

Langevin equation is written by

$$\gamma \dot{x}(t) = -kx(t) + \xi_{th}(t) + \xi_{act}(t) + f^p(t). \quad \text{MERGEFORMAT}$$

(S23)



The general solution of Eq. (S23) is  $x(t) = \gamma^{-1} \int_0^t dt' e^{-(t-t')/\tau_k} (\xi_{th}(t') + \xi_{act}(t') + f^p(t'))$ ,

where the initial memory term  $x(0)e^{-t/\tau_k}$  is neglected in a steady-state. The ensemble

average of the velocity is  $\langle v(t) \rangle = \frac{1}{\gamma} \left[ f^p(t) - \frac{1}{\tau_k} \int_0^t dt' e^{-(t-t')/\tau_k} f^p(t') \right]$  and the response

function  $\delta \langle v(t) \rangle / \delta f^p(t')$  is given as

$$\chi(t, t') = \frac{1}{\gamma} \left[ \delta(t-t') - \frac{1}{\tau_k} e^{-(t-t')/\tau_k} \theta(t-t') \right]. \quad \text{MERGEFORMAT}$$

(S24)

Note that the response function is independent of active force as well as thermal force.

Fig. S4A shows the active force and perturbation force at the time  $t = t_0$ . Fig. S5B shows

that the presence of the active force  $\xi_{act}(t)$  on the system does not change the response

time  $\tau_R$ . In this experiment the response time is  $\tau_R = \tau_k = 1.1 \text{ ms}$ .

### ***The average rate of heat dissipation in a steady state***

The velocity correlation function in frequency space is equal to

$C(\omega) = \langle v(\omega)v(-\omega) \rangle = \omega^2 S_{xx}(\omega)$ . Also, the amplitude of response function can be

calculated by Eq. (S23).

$$R(\omega) \equiv \text{Re}(\chi(\omega)) = \frac{1}{\gamma} \cdot \frac{\omega^2}{\omega^2 + 1/\tau_k^2} \quad \text{MERGEFORMAT}$$

(S25)

Then, the steady-state  $(t, t' \gg \tau_k, C(t, t') = C(t-t'), \text{ and } R(t, t') = R(t-t'))$  rate of heat

dissipation is given as

$$\langle \dot{\mathcal{Q}} \rangle = \gamma \int_{-\infty}^{\infty} \frac{d\omega}{2\pi} [C(\omega) - 2k_B T R(\omega)]. \quad \text{MERGEFORMAT (S26)}$$

We write  $D(\omega) \equiv \gamma (C(\omega) - 2k_B T R(\omega))$ . From Eqs. (S21) and (S25), we get

$$D(\omega) = \left( \frac{2k_B T_{act}}{\tau_c^2} \right) \cdot \left( 1 + \frac{\tau_c}{\tau_k} \right) \cdot \left[ \frac{\omega^2}{(\omega^2 + 1/\tau_k^2)(\omega^2 + 1/\tau_c^2)} \right]. \quad \text{MERGEFORMAT (S27)}$$

Then, we find the average rate of heat dissipation in a steady-state as

$$\langle \dot{\mathcal{Q}} \rangle = \int_{-\infty}^{\infty} \frac{d\omega}{2\pi} D(\omega) = \frac{k_B T_{act}}{\tau_c}, \quad \text{MERGEFORMAT (S28)}$$

where  $T_{act}$  is defined in Eq. (S12). The work production rate can be defined in three

different ways: (a)  $\dot{W} = (\partial/\partial t) k (x - \xi_{act}(t)/k)^2 / 2 = -(x - \xi_{act}(t)/k) \dot{\xi}_{act}(t)$ , (b)

$\dot{W} = (\partial/\partial t) [kx^2/2 - x\xi_{act}(t)] = -x\dot{\xi}_{act}(t)$ , and (c)  $\dot{W} = \dot{\xi}_{act}(t)$ . Here, (a) is from the

viewpoint of moving potential with the center at  $\xi_{act}(t)/k$ , (b) is defined as the summation

of harmonic potential  $kx^2/2$  and active potential  $x\xi_{act}(t)$ , and (c) is from the interpretation

of  $\xi_{act}(t)$  as an external time-dependent force. In all three cases, the heat dissipation rate

has the same expression  $\dot{\mathcal{Q}}(\gamma, \xi_{th}(t))$ . In the steady-state limit, all definitions of work rate

lead to the same average value equal to the average heat dissipation rate in Eq. (S28). The

three values become different in the transient period, which is not examined in detail in our

experiment but can be calculated rigorously.

### ***Maximum heat dissipation rate frequency***

The heat dissipation rate in frequency space has the maximum value at  $\omega_d$  which we get

$\partial D(\omega)/\partial \omega = 0$ . We find

$$\omega_d = \frac{1}{\sqrt{\tau_k \tau_c}}.$$

MERGEFORMAT

(S29)

### ***Experiment setup***

Fig. S5 shows the experimental setup in detail.

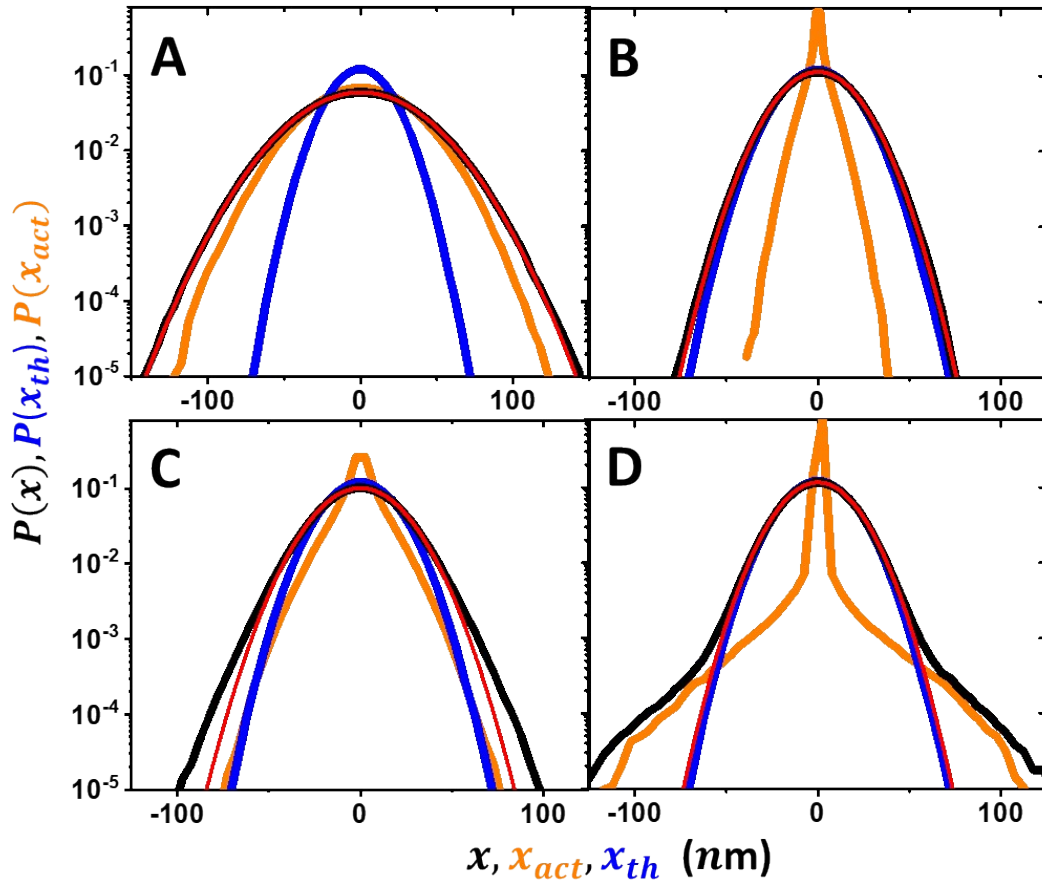

### Supplementary Figures

**FIG. S1. PDFs of particle position.** PDFs of  $x$  (black),  $x_{act}$  (orange), and  $x_{th}$  (blue) from Eq. (1) and Eq. (S2) by using computer simulation. The red solid curves are Gaussian fittings to  $P(x)$ . (A) and (B) show the PDFs when  $P(x)$  is Gaussian-like. (C) and (D) show the PDFs when  $P(x)$  is non-Gaussian. The conditions are (A)  $X = 20$  nm,  $\tau_c = 10$  ms and  $\tau_p = 2$  ms, (B)  $X = 20$  nm,  $\tau_c = 2$  ms and  $\tau_p = 10$  ms, (C)  $X = 40$  nm,  $\tau_c = 2$  ms and  $\tau_p = 8$  ms, and (D)  $X = 70$  nm,  $\tau_c = 4$  ms and  $\tau_p = 200$  ms.

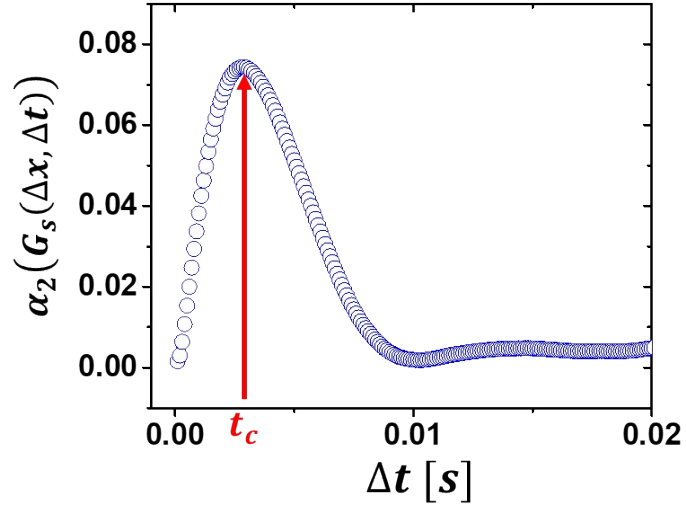

**FIG. S2.** The non-Gaussian parameter value of Van Hove self-correlation function  $G_s(\Delta x, \Delta t)$  vs.  $\Delta t$ .  $\alpha_2$  is obtained by computer simulation for  $X = 70\text{nm}$ ,  $\tau_c = 0.3\text{ms}$ , and  $\tau_k = 0.8\text{ms}$ . In the same condition, the non-Gaussian parameter value of  $P(x)$  is 0.

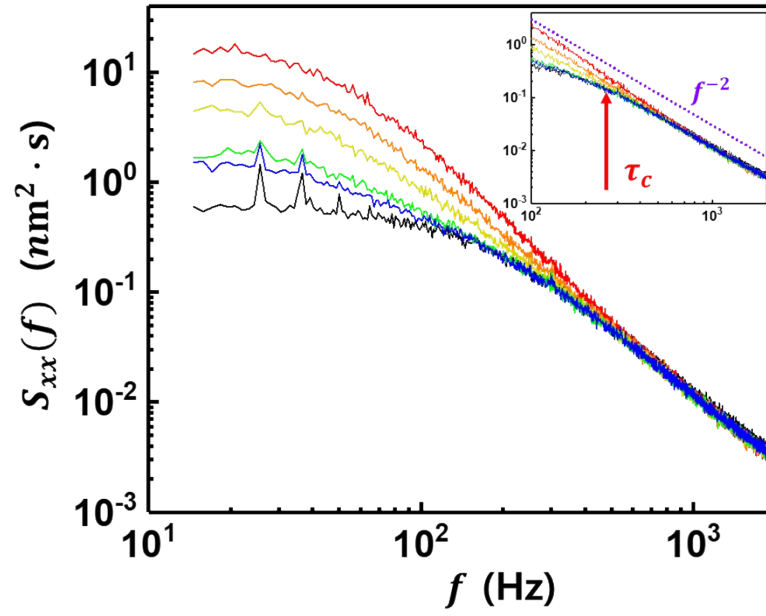

**FIG. S3. Power spectral density (PSD) of particle position for various conditions;**  $\tau_c/\tau_p$ : 4.0 (red), 2.0 (orange), 1.0 (yellow), 0.33 (green), and 0.25 (blue). Black corresponds to PSD without the active force. Here,  $X = 37\text{nm}$ ,  $\tau_c = 4\text{ms}$ , and  $\tau_k = 1.1\text{ms}$ . In the inset, the violet dotted line indicates the slope for free diffusion.

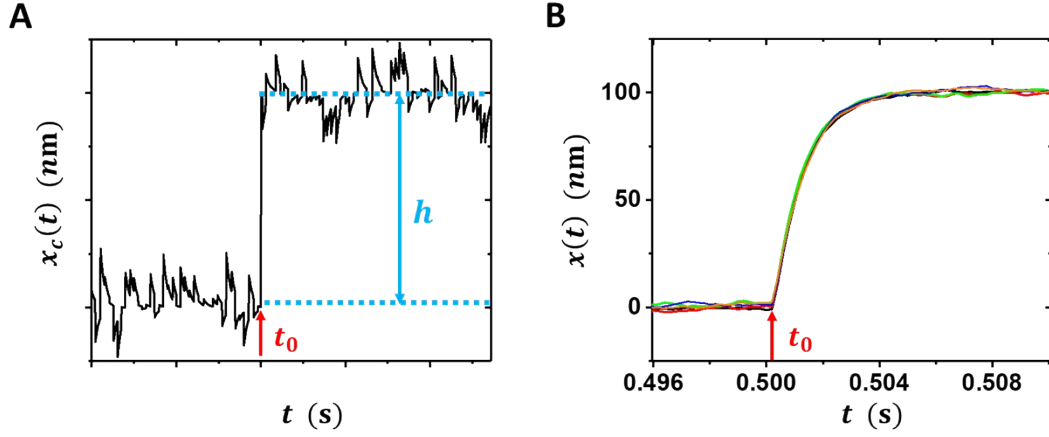

**FIG. S4. Measurement of the response function.** (A) The center of the trap is additionally shifted with distance  $h$  at  $t = t_0$ . During this process, the system is under the active force. (B) The average trajectory of the particle over 500 different measurements. The position of the particle is observed during the relaxation process in the same condition.

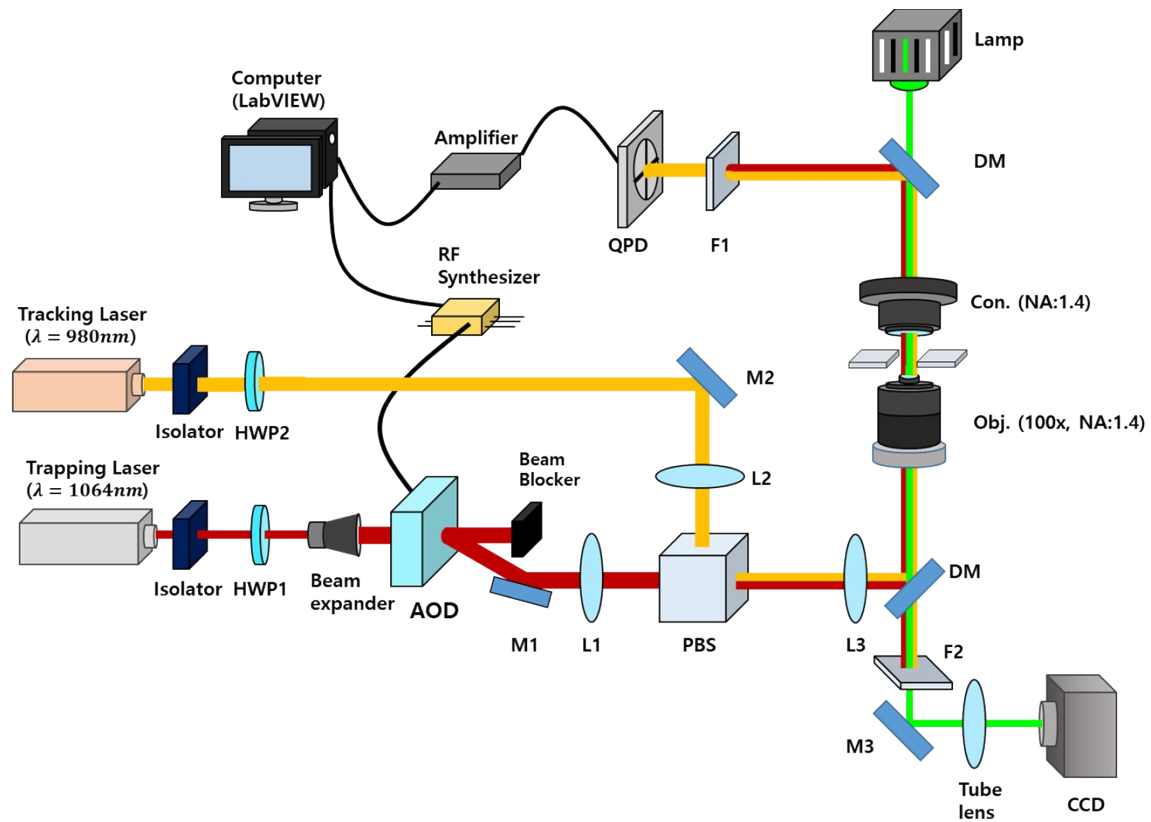

FIG. S5. Schematic diagram of experimental setup.
